1 **Poor adult nutrition impairs learning and memory in a parasitoid**

2 **wasp**

3

4 Hossein Kishani Farahani<sup>1\*</sup>, Yasaman Moghadassi<sup>2</sup>, Jean-Sebastien Pierre<sup>3</sup>, Stéphane Kraus<sup>4</sup>,

5 Mathieu Lihoreau<sup>4\*</sup>

6

7 *1. Equipe Recherches Agronomiques, Agronutrition, Carbonne, France*

8 *2. Department of Plant Protection, Faculty of Agriculture and Natural Resources,*

9 *University of Tehran, Karaj, Iran*

10 *3. University of Rennes 1, UMR-CNRS 6553 EcoBio, Avenue du Général Leclerc, Campus*

11 *de Beaulieu, 35042 Rennes Cedex, France.*

12 *4. Research Center on Animal Cognition (CRCA), Center for Integrative Biology (CBI);*

13 *CNRS, University Paul Sabatier – Toulouse III, France*

14 \* Corresponding authors:

15 [H.kishani@agro-nutrition.fr](mailto:H.kishani@agro-nutrition.fr)

16 Equipe Recherches Agronomiques, Agronutrition Co., Carbonne, France

17 Phone : +33781944086

18 [mathieu.lihoreau@univ-tlse3.fr](mailto:mathieu.lihoreau@univ-tlse3.fr)

19 Research Centre on Animal Cognition, UMR 5169 CNRS, University of Toulouse III, France,

20 phone: +33 6 33 43 57 06

21 **Running Title: nutrition quality and adults memory**

22

23 **Abstract:**

24 Animals have evolved cognitive abilities whose impairment can incur dramatic fitness costs.  
25 While malnutrition is known to impact brain development and cognitive functions in vertebrates,  
26 little is known in insects, whose small brain appears particularly vulnerable to environmental  
27 stressors. Here, we investigated the influence of diet quality on learning and memory in the  
28 parasitoid wasp *Venturia canescens*. Newly emerged adults were exposed for 24h to either  
29 honey, sucrose solution 20%, sucrose solution 10%, or no food, before being conditioned in an  
30 olfactory associative learning task in which an odor (orange) was associated to a reward (host  
31 larvae). Wasps fed honey showed 3.5 times higher learning performances and 1.5 times longer  
32 memory retention times than wasps fed sucrose solutions and starved wasps. Poor diets also  
33 reduced longevity and fecundity. Our results demonstrate the importance of early adult nutrition  
34 for optimal cognitive function in these parasitoid wasps that must quickly develop olfactory  
35 memories for choosing high quality hosts for their progeny.

36

37 **Keywords:** *Venturia canescens*; *Ephestia kuehniella*; olfactory learning; memory retention;  
38 nutrition

39

40

41

42

43

44

45

## 46 **Introduction**

47 Animals rely on various forms of learning and memories to exploit resources in their  
48 environment and adapt to changing conditions [1, 2, 3]. These cognitive abilities are sustained by  
49 brains that require large amounts of proteins to grow [4], but also lipids and carbohydrates for  
50 maintenance [5, 6, 7]. The process of learning, itself, imposes important energetic costs [8], and  
51 the formation of persistent (long-term) memories involves protein synthesis [9, 10]. Therefore,  
52 the ability of animals to acquire key nutrients in food is expected to directly impact their  
53 cognitive performances [11].

54 Malnutrition is known to affect cognitive functions in vertebrates (e.g. pigeons: [12],  
55 mice: [13], cats and dogs: [14]). In humans, for instance, high fat and caloric diets have been  
56 associated with hippocampal-dependent memory loss [15, 16]. By contrast, little is known about  
57 the cognitive effects of malnutrition in invertebrates. Insects, in particular, rely on an impressive  
58 range of learning and memory forms to interact socially and forage, and these cognitive abilities  
59 are implemented by only few neurons [17, 18]. The miniature brain of insects is thus particularly  
60 vulnerable to a range of environmental stressors, including poor nutrition [19]. For instance, in  
61 the fruit fly *Drosophila melanogaster*, larvae fed diets with unbalanced protein to carbohydrate  
62 ratios showed reduced learning performances in an aversive olfactory differential learning task  
63 [20]. In the Western honey bee *Apis mellifera*, adults fed pollen with a deficit in specific fatty  
64 acids (i.e. Omega-3, Omega-6) had impaired learning and memory performances in an appetitive  
65 olfactory differential learning task [21, 22]. These cognitive effects of malnutrition may incur  
66 particularly strong fitness costs in many solitary species where adults rely on learning and  
67 memory to find food and nourish their progeny by themselves.

68 Solitary parasitoid wasps, such as *Venturia canescens*, learn to associate an odor with a  
69 high-quality host to select nutritionally rich environments for the development of their offspring  
70 [23, 24, 25]. Before engaging in oviposition, adults encompass a critical period soon after  
71 emergence, where they need to find food [26, 27, 28]. Females typically acquire carbohydrates  
72 from nectar and honeydew [29, 30, 31]. Other key nutrients such as proteins, minerals and fat,  
73 are occasionally obtained from pollen [32]. Since olfactory memory formation is nutritionally  
74 demanding, we hypothesized that wasps fed highest quality diets would show the best cognitive  
75 performances.

76 Here, we tested whether diet quality during early adulthood affect the cognitive  
77 performances of *V. canescens* wasps. We experimentally exposed emerging females to one of  
78 four nutritional conditions of decreasing quality in terms of nutrient concentration, nutrient  
79 diversity, and energy content (honey – see composition in Table 1, sucrose 20%, sucrose 10%,  
80 no food). We then tested the impact of diet on cognition in a conditioning assay in which wasps  
81 had to associate an odor to a reward (host) in a flight tunnel. We further tested the influence of  
82 diet on fitness by monitoring the longevity and the reproductive success of these wasps.

## 83 **Results**

### 84 *Wasps did not show innate odor preference*

85 We first tested the influence of the nutritional condition on innate attraction to odors, by giving  
86 individual wasps a simultaneous choice between two odor sources (orange and vanilla) in a flight  
87 tunnel with two decisions chambers for 15 min (see details in Figure 1). The wasps did not  
88 display any preference for either odor, irrespective of their nutritional condition ( $\chi^2_2 = 0.13$ ,  $P$   
89  $= 0.93$ ,  $N = 50$ ). The proportion of wasps that made no choice (i.e. when the wasps did not fly  
90 after 5 mins in the tunnel) remained stable ( $30 \pm 2\%$ ) and was similar across nutritional conditions

91  $(\chi^2 = 0.9, P = 0.69, N = 50)$ . This indicates that the nutritional condition did not affect the  
92 motivation nor the motor activity of wasps in response to odorants. We therefore arbitrarily  
93 chose the orange odor as the conditioned odor (CS+) and the vanilla odor as the new odor (NOd)  
94 in all the subsequent behavioral tests.

#### 95 ***Wasps fed honey showed highest learning performance***

96 We then tested the effect of the nutritional condition on olfactory learning. To do so, we first  
97 conditioned each wasp in the presence of 30 host larvae and the orange odor (CS+) for 2h. We  
98 then tested the conditioned wasps for odor preference by giving them a choice between the CS  
99 (orange) and the NOd (vanilla) in the flight tunnel for 15 min. Learning was observed in wasps  
100 exposed to each of the four nutritional conditions but at different magnitudes (Figure 2; Binomial  
101 GLM Feeding;  $\chi^2=87.33, P<.0001$ ; Conditioning:  $\chi^2=14.48, P=0.0001$ ; Feeding $\times$  conditioning:  
102  $\chi^2=7.7, P=0.005$ ). The highest proportion of correct choices for the CS (85 $\pm$ 3%, N =50) was  
103 observed in wasps fed honey. This proportion decreased with diet quality, reaching intermediate  
104 levels in wasps fed sucrose diets (72 $\pm$ 2%, N= 50), and a minimum level in starved wasps  
105 (62 $\pm$ 2%, N = 50). The proportion of wasps that did not make a choice remained low across  
106 nutritional conditions (12  $\pm$  2%, N=50; Figure 2), but increased with decreasing diet quality,  
107 reaching a maximum in starved wasps (29 $\pm$ 3%, N =50; Binomial GLM Feeding;  $\chi^2=12.3,$   
108  $P=0.006$ ; Conditioning:  $\chi^2=8.93, P=0.002$ ; Feeding $\times$  conditioning:  $\chi^2=7.61, P=0.005$ ; Figure 2).  
109 Therefore, wasps fed highest diet quality showed highest learning performances.

#### 110 ***Wasps fed honey showed longest memory retention***

111 We further tested the effect of the nutritional condition on olfactory memory retention by testing  
112 wasps in the flight tunnel at different time periods, between 2h and 30h post conditioning (Figure  
113 3). Memory retention was significantly longer in wasps fed honey (27 $\pm$ 3h, N= 600) than in

114 wasps fed 20% ( $12 \pm 3h$ ,  $N= 600$ ) and 10% ( $17 \pm 2h$ ,  $N= 600$ ) sucrose solutions, and starved wasps  
115 ( $8 \pm 2h$ ,  $N= 600$ ; ANOVA:  $F= 302.2$ ,  $P < 0.0001$ ). Therefore, wasps fed highest diet quality  
116 showed longest memory retention.

### 117 *Wasps fed honey had highest longevity and fecundity*

118 We finally tested the effects of the nutritional condition (i.e. diets) and conditioning (i.e.  
119 conditioned vs unconditioned wasps) on fitness, by measuring the longevity and the fecundity of  
120 wasps. Both the nutritional condition and conditioning had significant effects on longevity  
121 (Figure 3A; Cox model; nutritional condition:  $p < 0.001$ ; conditioning:  $p < 0.001$ ; nutritional  
122 condition x conditioning:  $p = 0.504$ ). Honey diet reduced the risk of death by 16 compared to no  
123 food ( $HR = 0.06$ ), while conditioning increased this risk by 3 ( $HR = 2.97$ ) indicating a cost of  
124 learning and memory formation. The nutritional condition also influenced the fecundity of  
125 wasps, so that honey diet increased by 2.75 the number of offspring per female in comparison to  
126 no food (Figure 3B; Poisson GLM; diet:  $p < 0.001$ ; conditioning:  $p = 0.184$ ; diet x conditioning:  $p$   
127  $= 0.081$ ). Thus overall, early nutritional experience had long lasting effects on adult fitness.

### 128 **Discussion**

129 Recent studies showed that a lack of specific nutrients [21, 22] or an unbalanced ratio of these  
130 nutrients [20] in food can result in impaired cognitive abilities in model insect species, such as  
131 honey bees and fruit flies. Here, we found that olfactory learning performances and memory  
132 retention times of *V. canescens* wasps were considerably affected by a poor diet soon after adult  
133 emergence. This impact of early adult nutrition on cognition may be particularly critical in this  
134 parasitoid species, where females must learn to locate best quality hosts for their progeny.

135 *V. canescens* can learn a variety of olfactory and visual stimuli associated to their hosts  
136 [25, 33, 34]. Here we found that poor diet (sucrose solutions, or no food) at early stages of

137 adulthood significantly reduced olfactory learning and memory retention times. These effects are  
138 not developmental as wasps were exposed to nutritional treatments during 24h as adults only.  
139 Impaired cognition therefore likely reflects physiological needs for cognitive function in fully  
140 developed brains. The fact that conditioning affected longevity, irrespective of the diet, clearly  
141 shows the physiological cost associated to learning and memory formation, as previously shown  
142 in fruit flies [9].

143         Unsurprisingly, wasps exposed to food (either honey or sucrose solution) always  
144 performed better than starved wasps that presumably lacked energy for basal brain functions. But  
145 how can we explain differences in wasps fed honey or sucrose solutions? The fact that wasps  
146 exposed to different diets did not differ in their proportions of no choices, indicates that food  
147 composition did not affect the locomotion or the motivation of the wasps. Therefore, the  
148 observed effects are specific to learning and memory. We discuss two, non-mutually exclusive,  
149 possible mechanisms.

150         Firstly, honey could yield higher cognitive performance because it contains more total  
151 nutrients and/or energy. Overall, honey contained much more total energy (284cal/mg) than 20%  
152 sucrose solution (80cal/mg) and 10% sucrose solution (40cal/mg). It contained  
153 monosaccharaides, like glucose and fructose, that can directly or indirectly (when in combined  
154 forms such as glycogen) be absorbed by the insects [35]. These monosaccharaides constitute the  
155 carbohydrate-based energy source for the insects. By contrast, sucrose is a disaccharide  
156 consisting of one glucose and one fructose molecule that must be broken down by enzymatic  
157 reactions before being used as energy source, thus constituting an additional physiological cost  
158 [36]. This difference in total amount of carbohydrates in diets may also explain the important

159 difference in survival by wasps fed honey and wasps fed sucrose solution, as carbohydrates have  
160 a well-known positive impact on longevity in insects [29, 30, 37].

161 Alternately, the effects of early adult nutrition on cognition may be due to the lack of  
162 specific nutrients in food. Honey contains a rich diversity of nutrients including amino acids and  
163 minerals that were not present in sucrose solutions (e.g. Table 1). The most abundant amino acid  
164 in honey is proline [38, 39]. The endogenous neutral amino acid L-proline exhibits a variety of  
165 physiological and behavioral actions in the nervous system and in increasing or improving  
166 memory retention in vertebrates [40, 41]. In honey bees, a decrease of proline in body led to  
167 lower learning ability and memory retention [42]. In our experiments, the lack of proteins in  
168 sucrose solution likely explains the reduced reproductive success of wasps fed sucrose compared  
169 to wasps fed honey, as these are required nutrients for egg production. Honey also includes  
170 several macro and micro-elements minerals such as potassium, magnesium, calcium, iron,  
171 phosphorus, sodium [43]. Potassium is the most abundant mineral [43, 44]. In human, potassium  
172 uptake increase learning and memory [45]. Honey also contains potassium and sodium. The  
173  $\text{Na}^+/\text{K}^+$ -pump on postsynaptic receptors plays a critical role in synaptic transmission in the brain  
174 and a lack of these elements may induced impaired cognitive functions [46, 47, 48].

175 Unfortunately, our experimental design does not allow to disentangle these mechanisms.  
176 Nonetheless, our results demonstrate the crucial importance of adult feeding on their cognitive  
177 abilities, longevity and reproduction. These observations in the lab suggest poor adult nutrition  
178 can have dramatic consequences for wasps in natural conditions. The importance of nutrition  
179 may in fact be greatly magnified in the wild, where wasps must develop costly learning and  
180 memory to identify suitable hosts for oviposition, but also need to locate these hosts using  
181 olfactory cues associated to the presence of larvae [49]. Wild *V. canescens* wasps are often found



182 in environments where hosts are highly scattered, for instance in orchards where infested fruits  
183 are occupied by no more one or two larvae [34, 50]. It is therefore very likely that wasps must  
184 flight long distances in order to parasite, thereby incurring additional energetic costs of  
185 movements [51]. In these conditions, feeding of high quality foods, such as honey, may provide  
186 considerable advantages to wasps. Future experiments could further explore this critical  
187 interaction between diet and cognition, using experimental designs of nutritional ecology based  
188 on artificial diets controlling for the amount and concentration of nutrients (e.g. [11]). In recent  
189 years these approaches have been very successful to identify the effects of specific nutrients and  
190 energy contents on fitness traits in many organisms (e.g. flies: [29, 30]; crickets: [37]; mice:  
191 [52]), including in hymenoptera (e.g. honey bees: [53]; bumblebees: [54]), and yield  
192 considerable promises for investigations in cognition research.

193

## 194 **Material and Methods**

### 195 *Insect culture*

196 Wasps (*V. canescens*) and their hosts (flour moth *Ephestia kuehniella*) were cultured and tested  
197 in incubators at 25°C with a 16:8 Light: Dark photoperiod and 50 ± 5% relative humidity. The *V.*  
198 *canescens* culture originated from wild caught individuals sampled in 2017 (Saveh, Markazi  
199 province, Iran) and maintained at the University of Tehran. Natural populations of *V. canescens*  
200 contain both thelytokous (asexual) and arrhenotokous (sexual) individuals [55]. Here we only  
201 used thelytokous wasps as they are more dependent on nutritional resources acquired as adults  
202 (income resources) for reproduction and survival than arrhenotokous conspecifics [27]. *E.*  
203 *kuehniella* eggs were obtained from a laboratory culture at the Insectary and Quarantine Facility

204 of the University of Tehran. *E. kuehniella* larvae were reared on a standard diet made of 48.5g of  
205 wheat flour and 3g of brewer yeast [25].

206 To obtain experimental individuals, groups of 30 one-day old female wasps were  
207 presented ca. 200 5<sup>th</sup> instar host larvae in a large plastic box (30×20×20 cm) and allowed to lay  
208 eggs for 24h [25]. Twenty parasitized host larvae were then kept in smaller boxes (5×5×3 cm)  
209 until the emergence of adult wasps (range: 25-30 days). Newly emerged wasps (one day old)  
210 were fed a 10% honey solution (v/v) to maintain them alive [25]. These wasps (F0) were then  
211 placed in one of four nutritional conditions for 24 hours and let to lay eggs. Their progeny (F1)  
212 was raised and maintained 24h after emergence in the same nutritional condition before being  
213 tested.

214

#### 215 *Nutritional conditions*

216 Newly emerged (one day old) female wasps were isolated in glass boxes (10×5×3 cm) and given  
217 *ad libitum* access to either: (1) honey (70% carbohydrates: fructose (38% w/v), glucose (30%  
218 w/v), 1% fibers, 1.5% protein, total energy (284cal/mg)) (see details in Table 1), (2) 20% sucrose  
219 solution (w/v, total energy(80cal/mg)), (3) 10% sucrose solution (w/v, total energy (40cal/mg)),  
220 (4) or no food. Wasps were provided honey as droplets on wax-coated strips of paper. Sucrose  
221 solutions were provided in gravity feeders (i.e. 4 cm<sup>3</sup> plastic capsule with a capillary tube  
222 inserted at the bottom). Wasps were kept in these boxes for 24h before the behavioral assays.

223

#### 224 *Behavioral assays*

225 We performed the cognitive tests in a flight tunnel (200 x 50 x 50 cm) made of transparent  
226 Plexiglas (Figure 1; for more details see [56]). The experimental room was illuminated with

227 2000 lux lights provided by LED lights (Pars Shahab Lamp Co., Iran) [25]. Air was driven  
228 through the flight tunnel by a fan located at the upwind end, and extracted outside by a fume  
229 hood at the downwind end (wind speed of 70 cm/s). The end opposite to the start zone of the  
230 tunnel was divided by a glass separator wall in two decision chambers. Each decision chamber  
231 contained an odorant stimulus presented on a filter paper attached to a glass pipette placed  
232 vertically on a stand. The behavioral data were recorded through visual observation by an  
233 experimenter blind regarding to the nutritional conditions of the wasps.

#### 234 Innate odor preference

235 To control for any effect of the nutritional condition on odor preference, we assessed the innate  
236 odor preference of the wasps. Wasps from each nutritional condition were given a simultaneous  
237 choice between two synthetic odors in the flight tunnel: orange and vanilla (97% pure odors:  
238 Adonis Gol Darou Group, Iran) [57]. We assumed that our wasp population has never been  
239 exposed to these odors prior to the tests, neither in the field nor in the lab. Each odor was  
240 presented on a filter paper scented with 1 µl of the solution in one of the decision chambers of the  
241 tunnel. The wasp was placed at the start zone of the tunnel and allowed to make a choice  
242 between the two decision chambers for 15 minutes. Any wasp that spent more than three  
243 consecutive minutes within 3 cm around the scented filter paper (landed, walking or hovering  
244 around) was considered as “making a choice”. Previous studies show that a wasp landing on an  
245 odor site for more than three minutes remains longer than 15 minutes on that site [25]. Any wasp  
246 that did not fly in the tunnel within five minutes after the beginning of the test was considered as  
247 “making no choice” [25]. Fifty wasps were tested for each nutritional condition (N=200 wasps in  
248 total). Because we found no innate attraction for either odors, we arbitrarily selected the orange

249 odor as the conditioned stimulus (CS+) and the vanilla odor as the new odor (NOd) in all  
250 subsequent experiments.

251

## 252 Learning

253 We assessed the effect of diet on learning performances using olfactory conditioning. To make  
254 sure the wasps had some oviposition experience, and thus avoid the inter-individual variability in  
255 the sequence and duration of behavioral events associated with learning from the first host  
256 encountered [58], female wasps were individually exposed to 15 host larvae (5<sup>th</sup> instar) for 15  
257 min in a vial (2 cm x 10 cm) before conditioning. Sixty of these wasps were then transferred into  
258 conditioning tanks (25 cm x 25 cm x 25 cm) with another 30 host larvae (5<sup>th</sup> instar). The orange  
259 odor (CS+) was pumped into the tanks at an air speed of 1 m/s. The wasps were maintained in  
260 these conditions for 2h during which they could associate the orange odor to the presence of host  
261 larvae.

262 Learning performance was assessed 15 min after conditioning by presenting the odors of  
263 orange (CS) and vanilla (NOd) in each decision chamber of the flight tunnel. Every wasp that  
264 spent more than three consecutive minutes within 3 cm of the CS was considered as making a  
265 “correct choice”. Wasps that spent more than three minutes within 3 cm of the NOd made an  
266 “incorrect choice”. Wasps that did not fly within five minutes after the beginning of the test  
267 made “no choice”. Fifty wasps were tested for each nutritional condition (N=200 wasps in total).

268

## 269 Memory retention

270 We tested the effect of nutritional condition on memory retention time by observing the  
271 responses of the conditioned wasps either 2h, 4h, 6h, 8h, 10h, 12h, 14h, 16h, 18h, 20h, 24h, or

272 30h after conditioning [59]. The responses of the wasps to the CS and the NOd were recorded in  
273 the flight tunnel as previously described (see section learning). Fifty wasps were observed in  
274 each of the four nutritional conditions and twelve time intervals (N=2400 wasps in total).

275

### 276 *Longevity and fecundity*

277 We tested the effect of the nutritional condition and conditioning on fitness by measuring the  
278 longevity and fecundity of conditioned and unconditioned wasps in the four nutritional  
279 conditions. To study longevity, we maintained the wasps individually on one of the four  
280 nutritional conditions in a plastic box (30 x 20 x 20 cm). We recorded the number of dead wasps  
281 every day until all wasps died (18 days). To study fecundity, we placed each wasp in an  
282 oviposition cage with 30 host larvae (5<sup>th</sup> instar). Every day, we monitored the number of wasps  
283 emerging from the parasitized hosts and replaced the host larvae by new ones. Thirty females  
284 were used for each combination of conditioning and nutritional condition for longevity and for  
285 fecundity (N=480 wasps in total).

286

### 287 *Statistical analyses*

288 We analyzed the innate odor responses and learning data using SAS (SAS Institute Inc. 2003).  
289 We compared the innate odor response of wasps exposed to different nutritional conditions using  
290 Chi-square tests. We tested the effect of nutritional conditions on memory performance using a  
291 Generalized Linear Model (GLM) implemented in the procedure GENMOD (binomial family  
292 error, logit link function). We compared the least square estimates of the proportions in each  
293 level using the Chi-square approximation. When we found a significant effect of the treatment,  
294 we applied a Bonferroni's post hoc multiple comparison tests, and evaluated the two-by-two

295 comparisons at the Bonferroni-corrected significance level of  $P = 0.05/k$ , where  $k$  is the number  
296 of comparisons.

297 We estimated the effect of the nutritional condition on memory retention by developing a  
298 dynamic and statistical model following Kishani Farahani et al. [59]. Briefly, the estimation of  
299 forgetting relies on a series of observations recorded at different times  $t_1; t_2; \dots t_n$  after  
300 conditioning. At each time, a set of  $n_t$  subjects was subjected to a choice test with three possible  
301 responses:  $a$ ;  $b$ ; and  $c$ , which correspond respectively to a preference for the orange side, a  
302 preference for vanilla side, and to a no choice. The forgetting of conditioning results in a switch  
303 from a high level to a lower level of correct responses, a simultaneous switch from a low level to  
304 a high level of no choices, and a switch from a very low to a moderate level of incorrect choices.  
305 A constraint links the three responses as  $n_a + n_b + n_c = n_t$  or  $n_c = n_t - n_a - n_b$ . The course of these  
306 three responses over time can be described by two logistic functions written here as probabilities,  
307  $p_a, p_b, p_c$ , constrained by  $p_a + p_b + p_c = 1$ :

308

$$(1) \quad p_a = k_a - \frac{k_a - a_a}{1 + e^{(-b_a(t-t_0))}} + a_a$$

309

$$(2) \quad p_c = \frac{k_c - a_c}{1 + e^{(-b_c(t-t_0))}} + a_c$$

310

$$(3) \quad p_b = 1 - p_a - p_c$$

312

313

314 Where  $k_a$ , respectively  $k_c$ , and  $a_a$ , respectively  $a_c$ , define the sill and baselines of the logistic  
315 models (1) and (2): the baselines are  $a_a$  and  $a_c$ , and the seals are  $k_a + a_a$  in model (1),  $k_c + a_c$  in  
316 model (2).  $k_a + a_a$  estimates the initial state in model (1), and  $a_c$  the final state. It is the inverse in  
317 model (2), where  $a_c$  is the initial state and  $k_c + a_c$  the final state. A supplementary restriction lies  
318 in the fact that, as  $t_0$  represents the mean time to oblivion, i.e. the inflection time point of the  
319 logistics functions; it has to be the same in all three equations. The data consist of a vector of

320 three counts:  $V_t = (n_{at}, n_{bt}, n_{ct})$  the respective number of subjects responding a; b or c at time t.

321 An R script was written to do this (see Supplementary text S1). The model defined by equations  
322 1 to 3 was fitted individually on each set of ten data. The maximization of the likelihood cannot  
323 be fully automatic and requires an initial guess of the seven parameters  $k_a$ ;  $a_a$ ;  $b_a$ ;  $k_c$ ;  $a_c$ ;  $b_c$ ;  $t_0$ .  
324 This was done by a visual evaluation of each graphic representation of the crossed levels. We  
325 compared memory retention times across nutritional conditions using an Analysis of Variance  
326 (ANOVA, using SAS).

327 We analyzed longevity and fecundity data in R 4.0.3 (R Core Team 2020). We tested the  
328 effect of the nutritional conditions, conditioning and their interactions on longevity using a Cox  
329 proportional hazards regression model (function `coxph` in package “survival” [60]). We tested the  
330 effect of the nutritional conditions, conditioning and their interactions on fecundity using  
331 generalized linear mixed-effects model (GLMM) with Poisson family (function `glmer` in package  
332 “lme4” [61]). We added wasp identity and day of experiment as random factors in all models.

333

### 334 **Acknowledgements**

335 This work was funded by Agronutrition CO. (France) and the University of Tehran (Iran).  
336 Additionally, SK was supported by a PhD CIFRE grant from Koppert and the French National

337 Agency of Research and Technology (ANRT). ML was supported by the CNRS, two grants from  
338 the French National Research Agency (ANR-19-CE37-0024-02 – 3DNavibee; ANR-20-ERC8-  
339 0004-01 – BEEMOVE) and a grant from the European Regional Development Fund  
340 (MP0021763 - ECONECT). The sponsors had no involvement in the study design, the collection,  
341 and the analysis, the interpretation of the data, the writing, and the decision to submit the  
342 manuscript for publication.

### 343 **References**

- 344 1. Healy, S.D., & Jones C.M. Animal learning and memory: An integration of cognition and  
345 ecology. *Zoology*. **105(4)**, 321-7 (2002).
- 346 2. Shettleworth, S. J. *Cognition, Evolution, and Behavior* (2nd ed). Oxford University Press (2010).
- 347 3. Kis, A., Huber, L. & Wilkinson, A. Social learning by imitation in a reptile (*Pogona vitticeps*).  
348 *Anim. Cogn.* **18**, 325–331 (2015).
- 349 4. Niven, J. E. & Laughlin, S. B. Energy limitation as a selective pressure on the evolution of  
350 sensory systems. *J. Exp. Biol.* **211**, 1792–1804 (2008).
- 351 5. Mery, F. & Kawecki TJ. A fitness cost of learning ability in *Drosophila melanogaster*. *Proc. R.*  
352 *Soc. Lond. B.* **270(1532)**, 2465-2469 (2003).
- 353 6. Yoshihara, T., Sugihara, K., Kizuka, Y., Oka, S. & Asano, M. Learning/memory impairment and  
354 reduced expression of the HNK-1 carbohydrate in beta4-galactosyltransferase-II-deficient mice.  
355 *J. Biol. Chem.* **284(18)**, 12550-12561 (2009).
- 356 7. Bruce K. D., Zsombok A. & Eckel R. H. Lipid Processing in the brain: A key regulator of  
357 systemic metabolism. *Front. Endocrinol.* **8**, 60; 10.3389/fendo.2017.00060 (2017).
- 358 8. Burns, J.G., Foucaud, J. & Mery, F. Costs of memory: lessons from ‘mini’ brains. *Proc. R. Soc.*  
359 *Lond. B.* **278**, 923–929 (2011).
- 360 9. Mery F. & Kawecki TJ. A cost of long-term memory in *Drosophila*. *Science*. **308(5725)**, 1148  
361 (2005).



- 362 10. Sutton, M.A. & Schuman, E.M. Dendritic protein synthesis, synaptic plasticity, and memory.  
363 *Cell*. **127(1)**, 49-58 (2006).
- 364 11. Raubenheimer, D. & Simpson, S. Eat Like the Animals: What Nature Teaches Us about the  
365 Science of Healthy Eating. Sydney: Harper Collins (2020).
- 366 12. Scriba, M. F. *et al.* The effect of food quality during growth on spatial memory consolidation in  
367 adult pigeons. *J. Exp. Biol.* **220**, 573-581 (2017).
- 368 13. Liang, Q. *et al.* Postnatal vitamin D intake modulates hippocampal learning and memory in adult  
369 mice. *Front. Neurosci.* **12**,141; 10.3389/fnins.2018.00141 (2018).
- 370 14. May, K.A. & Laflamme, D.P. Nutrition and the aging brain of dogs and cat. *J. Am. Vet. Med.*  
371 *Assoc.* **255(11)**, 1245-1254 (2019).
- 372 15. Beilharz, J.E., Maniam, J. & Morris, M.J. Diet-induced cognitive deficits: The role of fat and  
373 sugar, potential mechanisms and nutritional interventions. *Nutrients*. **7(8)**, 6719-6738 (2015).
- 374 16. Spencer, S.J., Korosi, A., Layé, S., Shukitt-Hale, B., & Barrientos, R.M., Food for thought: How  
375 nutrition impacts cognition and emotion. *Npj. Sci. Food.* **1**, 7; [10.1038/s41538-017-0008-y](https://doi.org/10.1038/s41538-017-0008-y)  
376 (2017).
- 377 17. Giurfa, M. Cognition with few neurons: higher-order learning in insects. *Trends Neurosci.* **36(5)**,  
378 285-94 (2013).
- 379 18. Perry, C.J., Barron, A.B. & Chittka L. The frontiers of insect cognition. *Current Opinion in*  
380 *Behav. Sci.* **16**, 111–118 (2017).
- 381 19. Klein, S., Cabirol, A., Devaud, J.M., Barron, A.B. & Lihoreau, M. Why bees are so vulnerable to  
382 environmental stressors. *Trends Ecol. Evol.* **32(4)**, 268-278 (2017).
- 383 20. Lihoreau, M., Poissonnier, L.A., Isabel, G. & Dussutour, A. 2016. *Drosophila* females trade off  
384 good nutrition with high-quality oviposition sites when choosing foods. *J. Exp. Biol.* **219**, 2514-  
385 2524 (2016).

- 386 21. Arien, Y., Dag, A., Zarchin, S., Masci, T. & Shafi, S. Omega-3 deficiency impairs honey bee  
387 learning. *PNAS*. **112** (51),15761-15766 (2015).
- 388 22. Arien Y, Dag A, Shafir S. Omega-6:3 ratio more than Absolute lipid level in diet affects  
389 associative learning in honey bees. *Front. Psychol.* **9**,1001; 10.3389/fpsyg.2018.01001 (2018).
- 390 23. Thiel, A., Schlake, S. & Kosior, D. *Omnia tempus habent*: habitat-specific differences in  
391 olfactory learning and decision making in parasitic wasps. *Anim. Cogn.* **16**(2), 223-32 (2003).
- 392 24. Froissart, L., Giurfa, M., Sauzet, S. & Desouhant, E. Cognitive adaptation in asexual and sexual  
393 wasps living in contrasted environments. *PLOS ONE*. **12**(5), e0177581.  
394 10.1371/journal.pone.0177581 (2017).
- 395 25. Kishani Farahani, H., Moghadassi, Y., Alford, L. & van Baaren, J. Effect of interference and  
396 exploitative competition on associative learning by a parasitoid wasp: a mechanism for ideal free  
397 distribution? *Anim. Behav.* **151**, 157-163 (2019).
- 398 26. Desouhant, E., Driessen, G., Amat, I. & Bernstein, C. Host and food searching in a parasitic wasp  
399 *Venturia canescens*: a trade-off between current and future reproduction? *Anim. Behav.* **70**  
400 (1),145-152 (2005).
- 401 27. Pelosse, P., Bernstein, C. & Desouhant, E. Differential energy allocation as an adaptation to  
402 different habitats in the parasitic wasp *Venturia canescens*. *Evol. Ecol.* **21**, 669–685 (2007).
- 403 28. Benelli, G., Giunti, G., Tena, A. Desneux, N., Caselli, A. & Canale, A. The impact of adult diet  
404 on parasitoid reproductive performance. *J. Pest. Sci.* **90**, 807–823 (2017).
- 405 29. Lee, J.C. & Heimpel, G.E. Floral resources impact longevity and oviposition rate of a parasitoid  
406 in the field. *J. Anim. Ecol.* **77**, 565–572 (2008a).
- 407 30. Lee, J.C. & Heimpel, G.E. Effect of floral nectar, water, and feeding frequency on *Cotesia*  
408 *glomerata* longevity. *BioControl.* **53**, 289–294 (2008b).
- 409 31. Rusch, A., Suchail, S., Valantin-Morison, M., Sarthou, J.P. & Roger-Estrade, J. 2013. Nutritional  
410 state of the pollen beetle parasitoid *Tersilochus heterocerus* foraging in the field. *BioControl.* **58**  
411 (1), 17-26 (2013).

- 412 32. Campos, M. G. R. *et al.* Pollen composition and standardization of analytical methods. *J. Apic.*  
413 *Res.* **47(2)**, 156–163 (2008).
- 414 33. Lucchetta, P., Bernstein, C., Théry, M. Lazzari, C. & Desouhant, E. Foraging and associative  
415 learning of visual signals in a parasitic wasp. *Anim. Cogn.* **11**, 525–533 (2008).
- 416 34. Thiel, A., Schlake, S. & Kosior, D. Omnia tempus habent: habitat-specific differences in  
417 olfactory learning and decision making in parasitic wasps. *Anim. Cogn.* **16**, 223–232 (2013).
- 418 35. Rittschof, C.C. & Schirmeier S. insect models of central nervous system energy metabolism and  
419 its links to behavior. *Glia.* **66(6)**, 1160-1175 (2017).
- 420 36. Sammataro, S., Weiss, M. 2013. Comparison of productivity of colonies of honey bees, *Apis*  
421 *mellifera*, supplemented with sucrose or high fructose corn syrup, *J. Insect Sci.* **13(1)**, 19;  
422 [10.1673/031.013.1901](https://doi.org/10.1673/031.013.1901) (2013).
- 423 37. Maklakov, A.A. *et al.* Sex-specific fitness effects of nutrient intake on reproduction and lifespan.  
424 *Curr. Biol.* **18(14)**, 1062-1066 (2008).
- 425 38. Di Girolamo, F., D'Amato, A. & Righetti, P.G. Assessment of the floral origin of honey via  
426 proteomic tools. *J. Proteom.* **75(12)**, 3688-93 (2012).
- 427 39. Kečkeš, J. *et al.* Amino acids profile of Serbian unifloral honeys. *J. Sci. Food Agric.* **93**, 3368-  
428 3376 (2013).
- 429 40. Wyse AT1, Netto CA. Behavioral and neurochemical effects of proline. *Metab. Brain. Dis.* **26(3)**,  
430 159-172 (2011).
- 431 41. Schulz, D., Morschel, J., Schuster, S., Eulenburg, V. & Gomeza, J. Inactivation of the mouse L-  
432 proline transporter PROT alters glutamatergic synapse biochemistry and perturbs behaviors  
433 required to respond to environmental changes. *Front. Mol. Neurosci.* **11**, 279;  
434 [10.3389/fnmol.2018.00279](https://doi.org/10.3389/fnmol.2018.00279) (2018).
- 435 42. Gage S. L. *et al.* *Nosema ceranae* parasitism impacts olfactory learning and memory and  
436 neurochemistry in honey bees (*Apis mellifera*). *J. Exp. Biol.* **19**, 221; [10.1242/jeb.161489](https://doi.org/10.1242/jeb.161489) (2018).

- 437 43. Solayman, M. *et al.* Physicochemical properties, minerals, trace elements, and heavy metals in  
438 honey of different origins: A comprehensive review. *Compr. Rev. Food. Sci. Food. Saf.* **15**, 219-  
439 233 (2016).
- 440 44. Yücel, Y. & Sultanoğlu, P. 2013. Characterization of Hatay honeys according to their multi-  
441 element analysis using ICP-OES combined with chemometrics. *Food Chem.* **140(1-2)**, 231-237  
442 (2013).
- 443 45. Cisternas, P. *et al.* 2015. The increased potassium intake improves cognitive performance and  
444 attenuates histopathological markers in a model of Alzheimer's disease, *BBA-Mol. Basis Dis.*  
445 **1852(12)**, 2630-2644 (2015).
- 446 46. Pivovarov, A.S., Calahorro, F. & Walker, R.J. Na<sup>+</sup>/K<sup>+</sup>-pump and neurotransmitter membrane  
447 receptors. *Invert. Neurosci.* **19(1)**, 1; 10.1007/s10158-018-0221-7 (2018).
- 448 47. Gardoni, F. *et al.* Decreased NR2B subunit synaptic levels cause impaired long-term potentiation  
449 but not long-term depression. *J. Neurosci.* **29(3)**, 669-77 (2009).
- 450 48. Zhang, L. *et al.* Na(+)/K(+)-ATPase inhibition upregulates NMDA-evoked currents in rat  
451 hippocampal CA1 pyramidal neurons. *Fundam. Clin. Pharmacol.* **26(4)**, 503-12 (2012).
- 452 49. Vet, L. E. M., Wackers, F. L. & Dicke, M. How to hunt for hiding hosts - the reliability-  
453 detectability problem in foraging parasitoids. *Netherlands J. Zool.* **41**, 202–213 (1991).
- 454 50. Driessen, G. & Bernstein, C. Patch departure mechanisms and optimal host exploitation in an  
455 insect parasitoid. *J. Anim. Ecol.* **68(3)**, 445–59 (1999).
- 456 51. Amat I. *et al.* Fuelling flight in a parasitic wasp: which energetic substrate to use? *Ecol. Entomol.*  
457 **37(6)**, 480–489 (2012).
- 458 52. Solon-Biet, S.M. *et al.* 2015. Macronutrients, reproduction, and lifespan in mice. *PNAS.*  
459 **112(11)**, 3481-3486 (2015).
- 460 53. Altaye, S.Z., Pirk, C.W., Crewe, R.M. & Nicolson, S.W. Convergence of carbohydrate-biased  
461 intake targets in caged worker honeybees fed different protein sources. *J. Exp. Biol.* **213(19)**,  
462 3311-3318 (2010).

- 463 54. Kraus, S. *et al.* Bumblebees adjust protein and lipid collection rules to the presence of brood.  
464 *Curr. Zool.* **65**, 437-446 (2019).
- 465 55. Foray, V., Henri1, H., Martinez1, S., Gibert, P. & Desouhant, E.. Occurrence of arrhenotoky and  
466 thelytoky in a parasitic wasp *Venturia canescens* (Hymenoptera: Ichneumonidae): Effect of  
467 endosymbionts or existence of two distinct reproductive modes? *Eur. J. Entomol.* **110(1)**, 103–  
468 107 (2013).
- 469 56. Drost, Y.C., Lewis, W.J. & Tumlinson, J.H. Beneficial arthropod behavior mediated by airborne  
470 semiochemicals. *J. Chem. Ecol.* **14**, 1607–1616 (1988).
- 471 57. Scotto-Lomassese, S. *et al.* Suppression of adult neurogenesis impairs olfactory learning and  
472 memory in an adult insect. *J. neurosci.* **23(28)**, 9289–9296 (2003).
- 473 58. Mills, N.J. & Kuhlmann, U. Oviposition behavior of *Trichogramma platneri* Nagarkatti and  
474 *Trichogramma pretiosum* Riley (Hymenoptera: Trichogrammatidae) in patches of single and  
475 clustered host eggs. *Biol. Control.* **30**, 42–51 (2004).
- 476 59. Kishani Farahani, H. *et al.* Early life nutritional quality effects on adult memory retention in a  
477 parasitic wasp. *Behav. Ecol.* **28(3)**, 818-826 (2017).
- 478 60. Therneau, T. A Package for Survival Analysis in R. R package version 3.2-7, [https://CRAN.R-](https://CRAN.R-project.org/package=survival)  
479 [project.org/package=survival](https://CRAN.R-project.org/package=survival) (2020).
- 480 61. Bates, D., Maechler, M., Bolker, B. & Walker, S. Fitting Linear Mixed-Effects Models  
481 Using lme4. *J. Stat. Softw.* **67(1)**, 1-48 (2015).

482

483

484

485

486

487 **Table 1.** Honey composition. Honey analysis was made by ASA Laboratory (Tehran, Iran) based  
488 on ISIRI-7610, ISIRI-92 and European Honey Directive and the Codex Alimentarius Standard  
489 for Honey standards.  
490

491

492

493

494

495

496

497

498

499

500

501

502

503

504

505

506

507

508

509

510

511

512

513

514

515

516

517

518

519

520

521

522

523

524

525

526

| <b>Ingredients</b>   |            | <b>Per 100 g</b> |
|----------------------|------------|------------------|
| <b>Protein</b>       |            | 1.5 g            |
| <b>Carbohydrates</b> |            | 70 g             |
| <b>Sugars</b>        | Glucose    | 30 g             |
|                      | Fructose   | 38 g             |
| <b>Fat</b>           |            | 0                |
| <b>Fiber</b>         |            | 1 g              |
| <b>Vitamins</b>      | B6         | 4%               |
|                      | C          | 3%               |
|                      | Riboflavin | 8%               |
|                      | Folate     | 3%               |
| <b>Potassium</b>     |            | 50mg             |
| <b>Sodium</b>        |            | 10mg             |
| <b>Total Energy</b>  |            | 284 cal/mg       |

527 Figure legends:

528 Figure 1. **Schematic view of the flight tunnel (top view)**. Individual wasps were introduced in  
529 the start chamber and observed choosing between the two odors displayed on filter papers in the  
530 decision chambers for 15 minutes.

531 Figure 2. **Learning performances**. Percentages of correct choices for the conditioned stimulus  
532 (CS, orange odor) and no choices for each nutritional condition. Box plots represent the median  
533 (bold line), the interquartile range (length of box), and extreme, maximum and minimum, data  
534 points. Generalized Linear Models (GLM) were implemented with the binomial family error and  
535 logit link. Different letters above bar plots indicate significant differences between the treatments  
536 after Bonferroni correction ( $P = 0.0125$ ).  $N = 50$  wasps per nutritional condition (200 wasps in  
537 total).

538 Figure 3. **Memory retention times**. Box plots show the median (bold line), the interquartile  
539 range (length of box), and extreme, maximum and minimum, data points. Memory retentions  
540 were compared using one way analysis of variance (ANOVA). Different letters indicate  
541 significant differences between the treatments after Bonferroni correction ( $P = 0.0125$ ).  $N = 50$   
542 wasps per nutritional condition and time interval (2400 wasps in total).

543 Figure 4. **Longevity and fecundity**. Effect of the nutritional condition (colors) and conditioning  
544 (solid or dashed lines) on survival probability (**a**) and fecundity (**b**) of female wasps. Survival  
545 curves were obtained from Kaplan Meier model (function `survfit` in R package “survival”  
546 (Therneau 2015)). In the boxplot, the central line is the median, the edges of the box are the 25th  
547 and 75th percentiles, the whiskers extend to the most extreme data points not considered outliers,  
548 outliers are represented by points. Median lifespan is indicated for each group in the fecundity  
549 graph. Different letters indicate significant differences between the treatments after Tukey post-  
550 hoc.

551

552

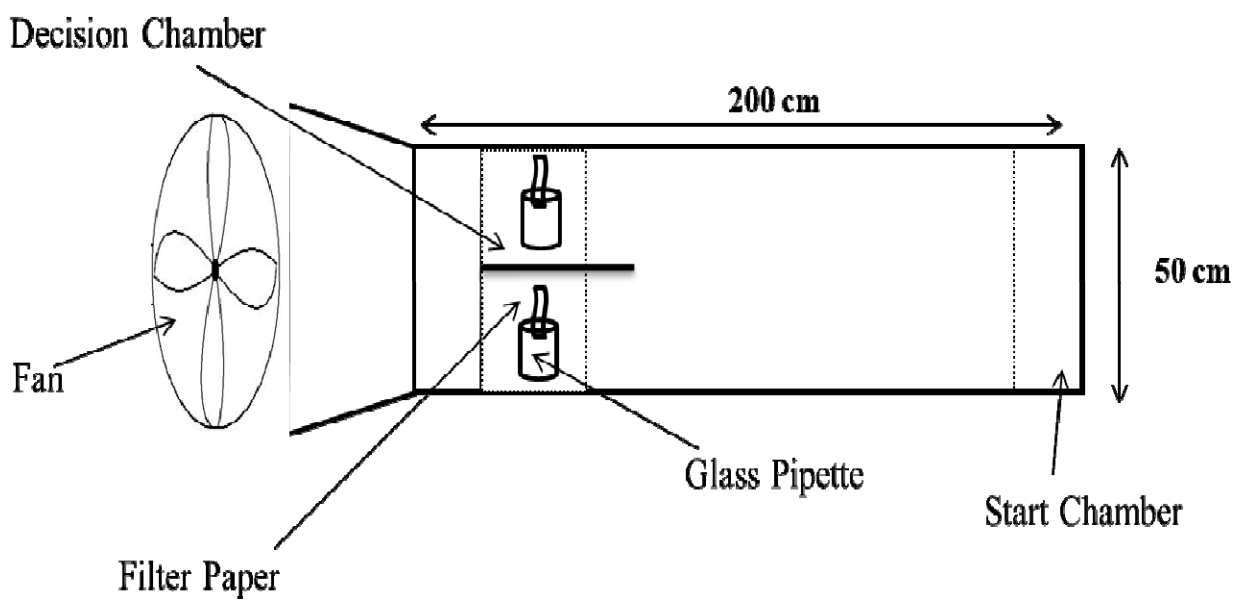

553

554

555 **Figure 1:**

556



557  
558  
559

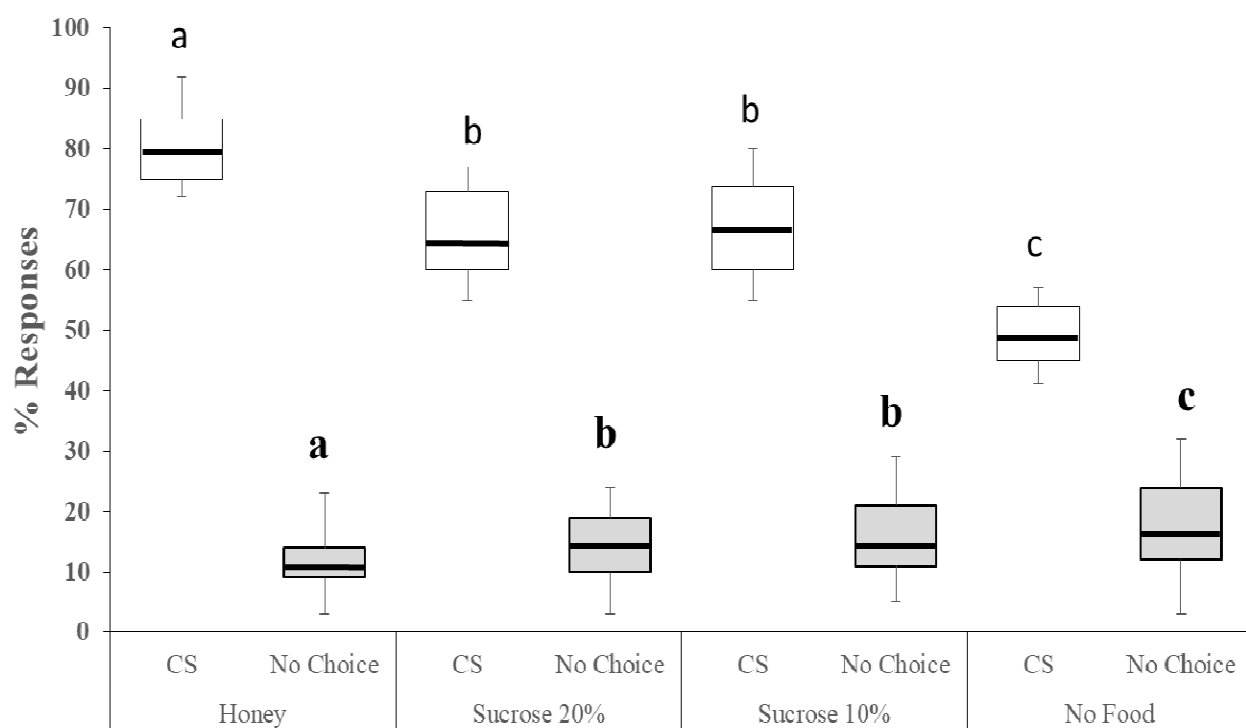

560

561

562 **Figure 2.**

563

564

565

566

567

568

569

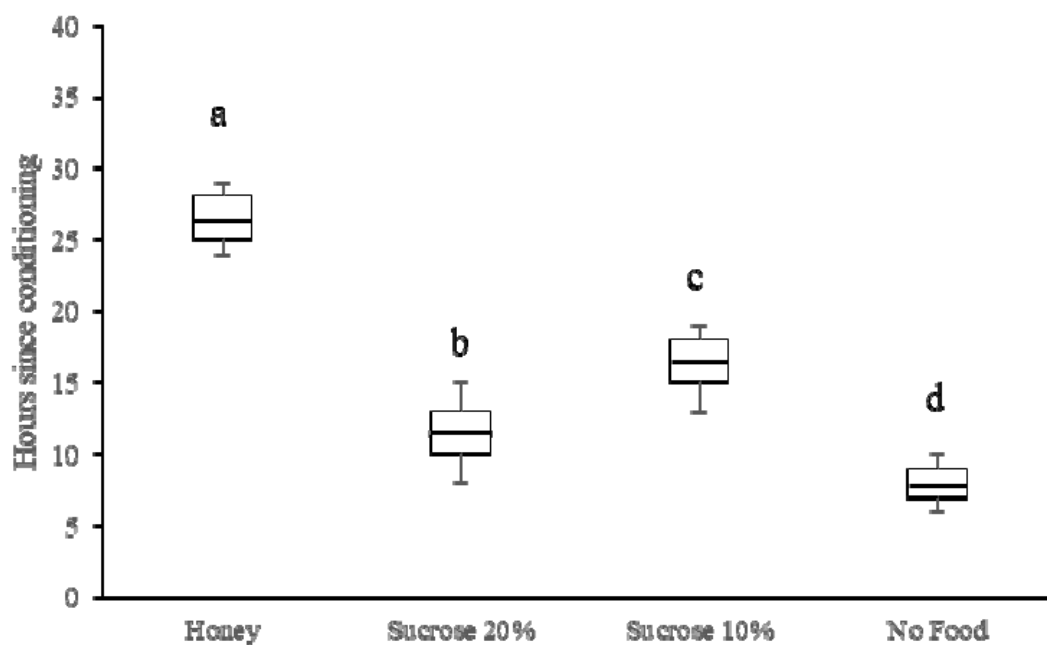

570

571

572 **Figure 3.**

573

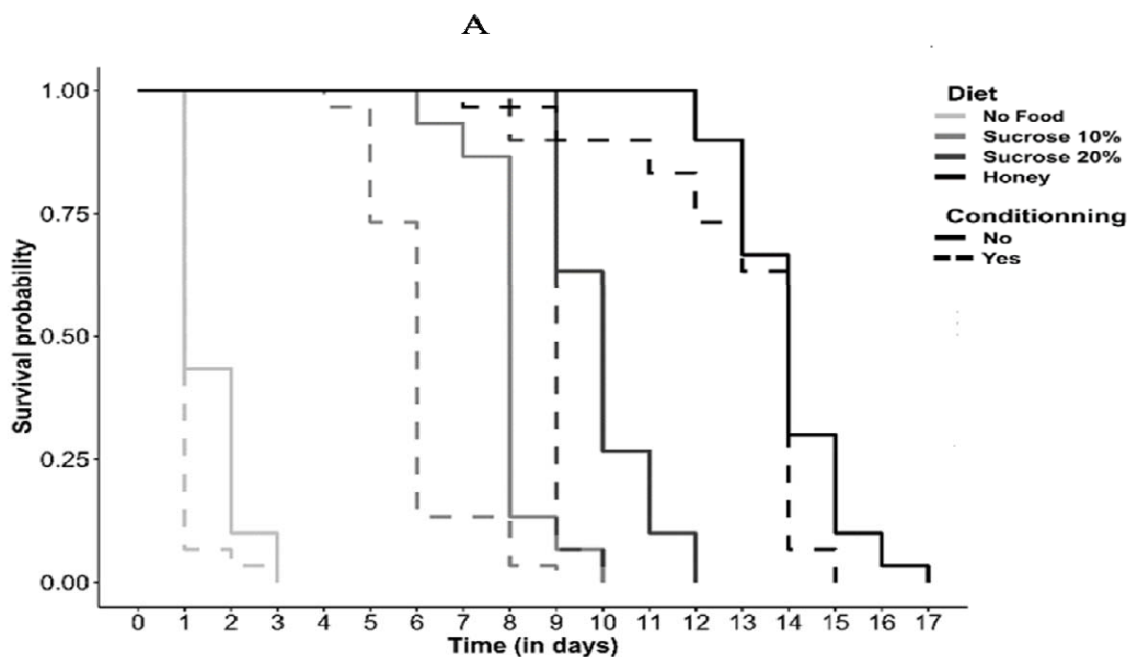

574  
575

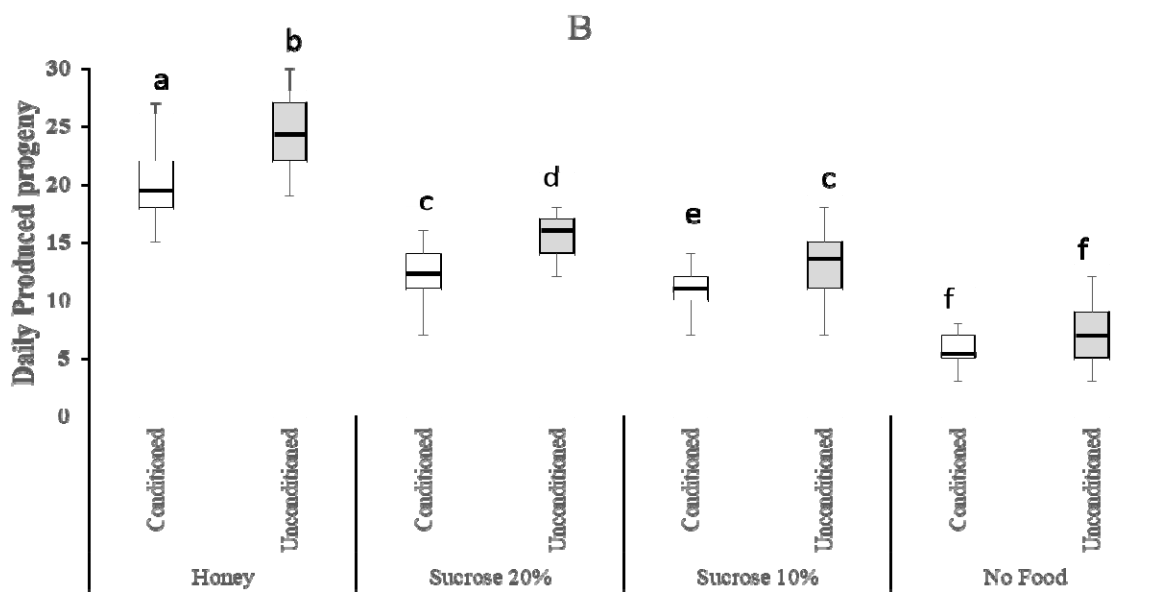

576  
577

**Figure 4.**

578  
579
